# Supplementary material for: SNCA locus Triplication Drives Severe Parkinson’s Disease: Platelet and Blood Expression Profiles Evidence Systemic Involvement
Source: Research Square preprint supplement (doi:10.21203/rs.3.rs-8422817/v1), 2026-01-21
Supplement: Supplementary file 1 [file 5bcf1ac278089441c8015210.docx]

**Supplementary material**

**1. Supplemental Tables**

**Table S1:** Genes included in the diagnostic panel for parkinsonism/dystonia.

| Panel | n1 | Genes |
| --- | --- | --- |
| Parkinsonism/dystonia  PD_DYT_2022_v2 | 92 | DJ1, ATP13A2, PINK1, SLC2A1, DNAJC6, GBA, XPR1, SLC30A10, HPCA, GPR88, SPAST, SPR, DCTN1, HTRA2, REEP1, PRKRA, PNKD , GIGYF2, CYP27A1, PTRHD1, SLC19A3, COL6A3, ADCY5, EIF4G1, DNAJC13, CP, PCCB, GLB1, SNCA, ADH1C, QDPR, SLC6A3, PDGFRB, CSF1R, PARK2, MMUT, PDE10A, SGCE, DDC, RELN, RNF216, SLC20A2, THAP1, VPS13A, TOR1A, CIZ1, CACNA1B, KIAA1161, KCNMA1, TH, ANO3, ATM, ACAT1, PTS, LRRK2, SCN8A, PCCA, ATP7B, NKX2-1, ATL1, GCH1, NPC2, ATXN3, FOXG1, POLG, VPS13C, SPG11, PRRT2, VPS35, FA2H, MAPT, KIF1C, GNAL, NPC1, TUBB4a, C19orf12, ATP1A3, FTL, KMT2B, GCDH, PANK2, TMEM230 , SYNJ1, FBXO7, PLA2G6, PDGFB, KCTD17, WDR45, TAF1, RAB39B, HPRT, XK |

1 number of genes included in the panel

**Table S2**: Primer sequences and combinations.

| **Symbol** | **Transcript variant** | **RefSeq** | **Primer sequence, 5’ 🡪 3’** |
| --- | --- | --- | --- |
|  | *SPP1*tv1 | NM_001040058.2 | AGC CCC ACA GAA TGC TGT GT |
| *SPP1* |  |  | GTC GTT CGA GTC AAT GGA GT |
|  | *SPP1*tv2 | NM_000582.3 | AGC CCC ACA GAA TGC TGT GT |
|  |  |  | GTC GTT CGA GTC AAT GGA GT |
| *ABCG2* | *ABCG2*tv1 | NM_004827.3 | CAG CTT CCA ATG ACC TGA AG |
|  |  |  | ATG GCG TTG AGA CCA GGT TT |
| *PPM1K* |  | NM_152542.5 | TGG TGT CAT AGC AGA ACC TG |
|  |  |  | GAT CAT GGC ACT GAT TGA CA |
| *HERC6* | *HERC6*tv1 | NM_017912.4 | CTG CTT GTC TGA CTG CAA GT |
|  |  |  | TGG AAG AGC TCT GAG CAG AT |
| *GPRIN3* |  | NM_198281.3 | AGA GAC GGT GCT TGG GAT AT |
|  |  |  | AGT CAG AGC TCA GAG TGA TG |
|  | *SNCA*tv1 | NM_000345.4 | TTC AAG CCT TCT GCC TTT CC |
|  |  |  | ACC ACT GCT CCT CCA ACA T |
| *SNCA* | *SNCA*tv2 | NM_001146054.2 | AGT CGG AGT TGT GGA GAA GCA |
|  |  |  | ACC ACT GCT CCT CCA ACA T |
|  | *SNCA*tv3 | NM_001146055.2 | ATC CAG GAA CAG CTG TCT TC |
|  |  |  | ACC ACT GCT CCT CCA ACA T |
| *MMRN1* | *MMRN1*tv2 | NM_007351.3 | ACC AGG CTG AAA GTC ATA CA |
|  |  |  | GAG TAA GTG TTC CTT ACA TCA |
| *NLRP3* | *NLRP3*tv1 | NM_004895.5 | TGG ATC TTC GCT GCG ATC AA |
|  |  |  | CAC TCC TCT TCA ATG CTG TC |
| *TLR2* | *TLR2*tv4 | NM_001318790.2 | CAG TGT TTG GTG TTG CAA GC |
|  |  |  | TAT GTG GCA TTG TCC AGT GC |
| *TLR4* | *TLR4*tv1 | NM_138554.5 | TCT CAA CCA AGA ACC TGG AC |
|  |  |  | GGT GGC TTA GGC TCT GAT AT |
| *YWHAQ* |  | NM_006826.4 | TAT CGG GAG AAA GTG GAG TC |
|  |  |  | TTC AGC AAG GTA CCG GAA GT |
| *YWHAZ* | *YWHAZ*tv2 | NM_145690.3 | ACG GAG CTA AGA GAT ATC TGC |
|  |  |  | CTC AGC CAA GTA ACG GTA GTA |
| *YWHAB* | *YWHAB*tv2 | NM_139323.4 | AGG AAG GAA GAG GTC ATC TC |
|  |  |  | ACT CCA AGT CCA GTG CTC TT |
| *YWHAG* |  | NM_012479.4 | AGC AAC TGG TGC AGA AAG CC |
|  |  |  | TAG GCC ACA GAC AGA AGG T |
| *YWHAH* |  | NM_003405.4 | TAT GAA GGC GGT GAC AGA GC |
|  |  |  | ATG CTG CTA ATG ACC CTC CA |
| *SLC18A2* |  | NM_003054.6 | AGC TCA TCC TGT TCA TCG TG |
|  |  |  | CGG TGA CCA TAG TCG AGT TA |
| *RPS18* |  | NM_022551.3 | CCT TTG CCA TCA CTG CCA TT |
|  |  |  | ATG GTG ATC ACA CGT TCC AC |
| *RPL11* | *RPL11*tv1 | NM_000975.5 | CAT CCA CAA ACT CTG TCA CA |
|  |  |  | AGA TTT CTT CTG CCT TGG CC |
| *SNRPD3* | *SNRPD*tv1 | NM_004175.5 | AGC AGA GGA CAA CAT GAA CTG |
|  |  |  | TAA CAT GGG TGC GTT CTT CAG |
| *RDX* |  | NM_002906.4 | ATG CCG AAA CCA ATC AAC GT |
|  |  |  | AAC ATC CTG CTG TGT TAC CT |
| *PBGD1* |  | NM_032507.4 | ACA CAC AGC CTA CTT TCC AAG |
|  |  |  | TCA ATG TTG CCA CCA CAC TGT |
| *ACTB* |  | NM_00101.5 | TCT ACA ATG AGC TGC GTG TG |
|  |  |  | TAG ATG GGC ACA GTG TGG GT |

**Table S3:** Clinical and demographic data of PD patients and control individuals.

|  | PD | CTRLs |
| --- | --- | --- |
| n1 | 15 | 18 |
| Male/female, n | 8/7 | 8/10 |
| age sample2, years (age range, years) | 46.6 (40 - 53) | 43.6 (37 - 48) |
| age PD onset, years (range, years) | 43.9 (38 - 50) | n/a |
| disease duration, years (range, years) | 2.4 (0 - 5) | n/a |

1 number of participants, 2 age at sample obtaining; n/a, not applicable

**2. Supplemental Figures**


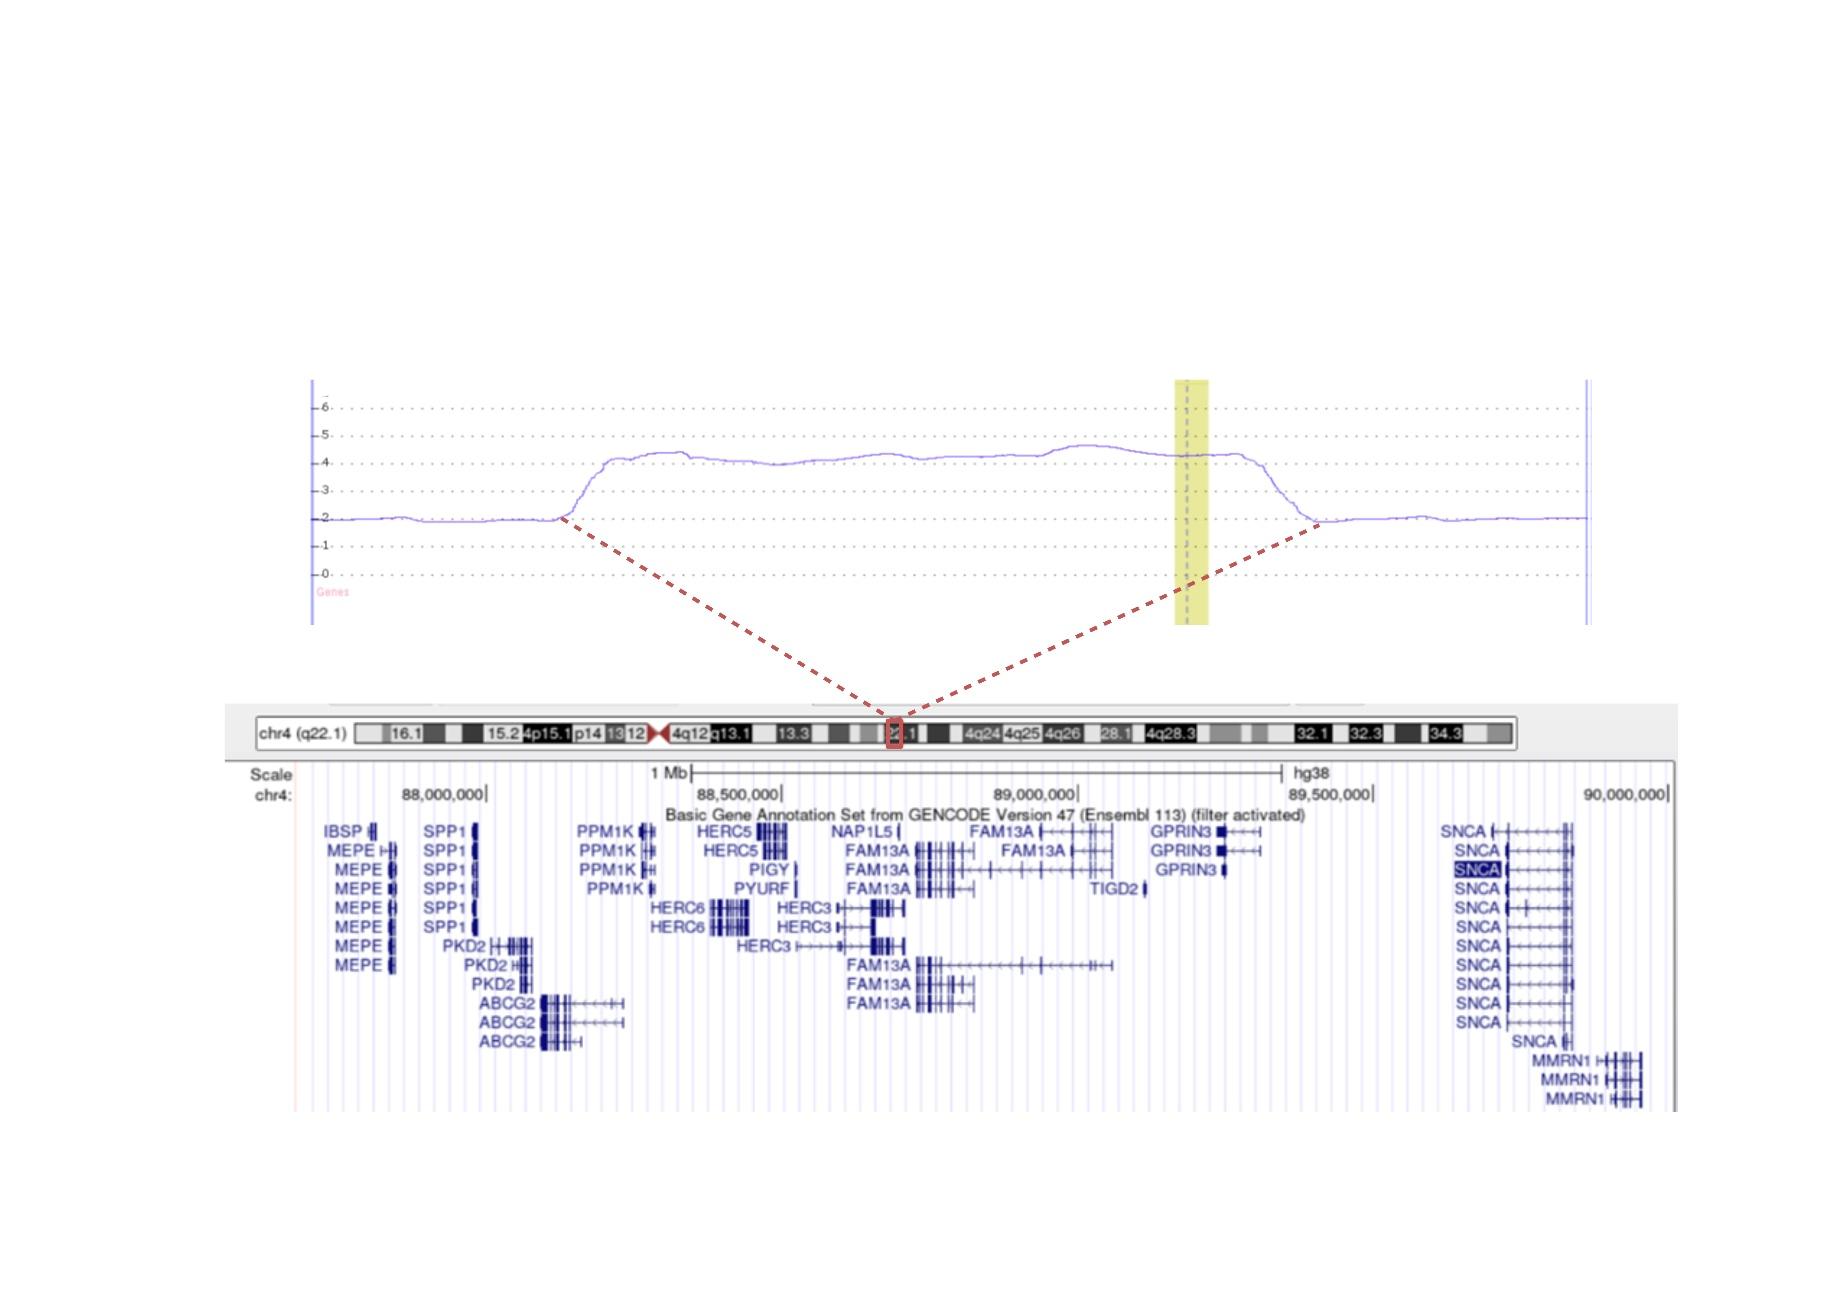


**Supplementary Fig.1. Schematic representation of the *SNCA* locus triplication**. Upper part: smooth signal of the *SNCA* locus amplification obtained by the Chromosome Analysis Suite (ChAS) software (the green bar represents the *SNCA* gene); lower part: protein-coding genes within the triplicated locus on chromosme 4q22.1 (image obtained from the UCSC Genome Browser (hg38), accessed on January 22, 2025 at <https://genome.ucsc.edu/>)**.**


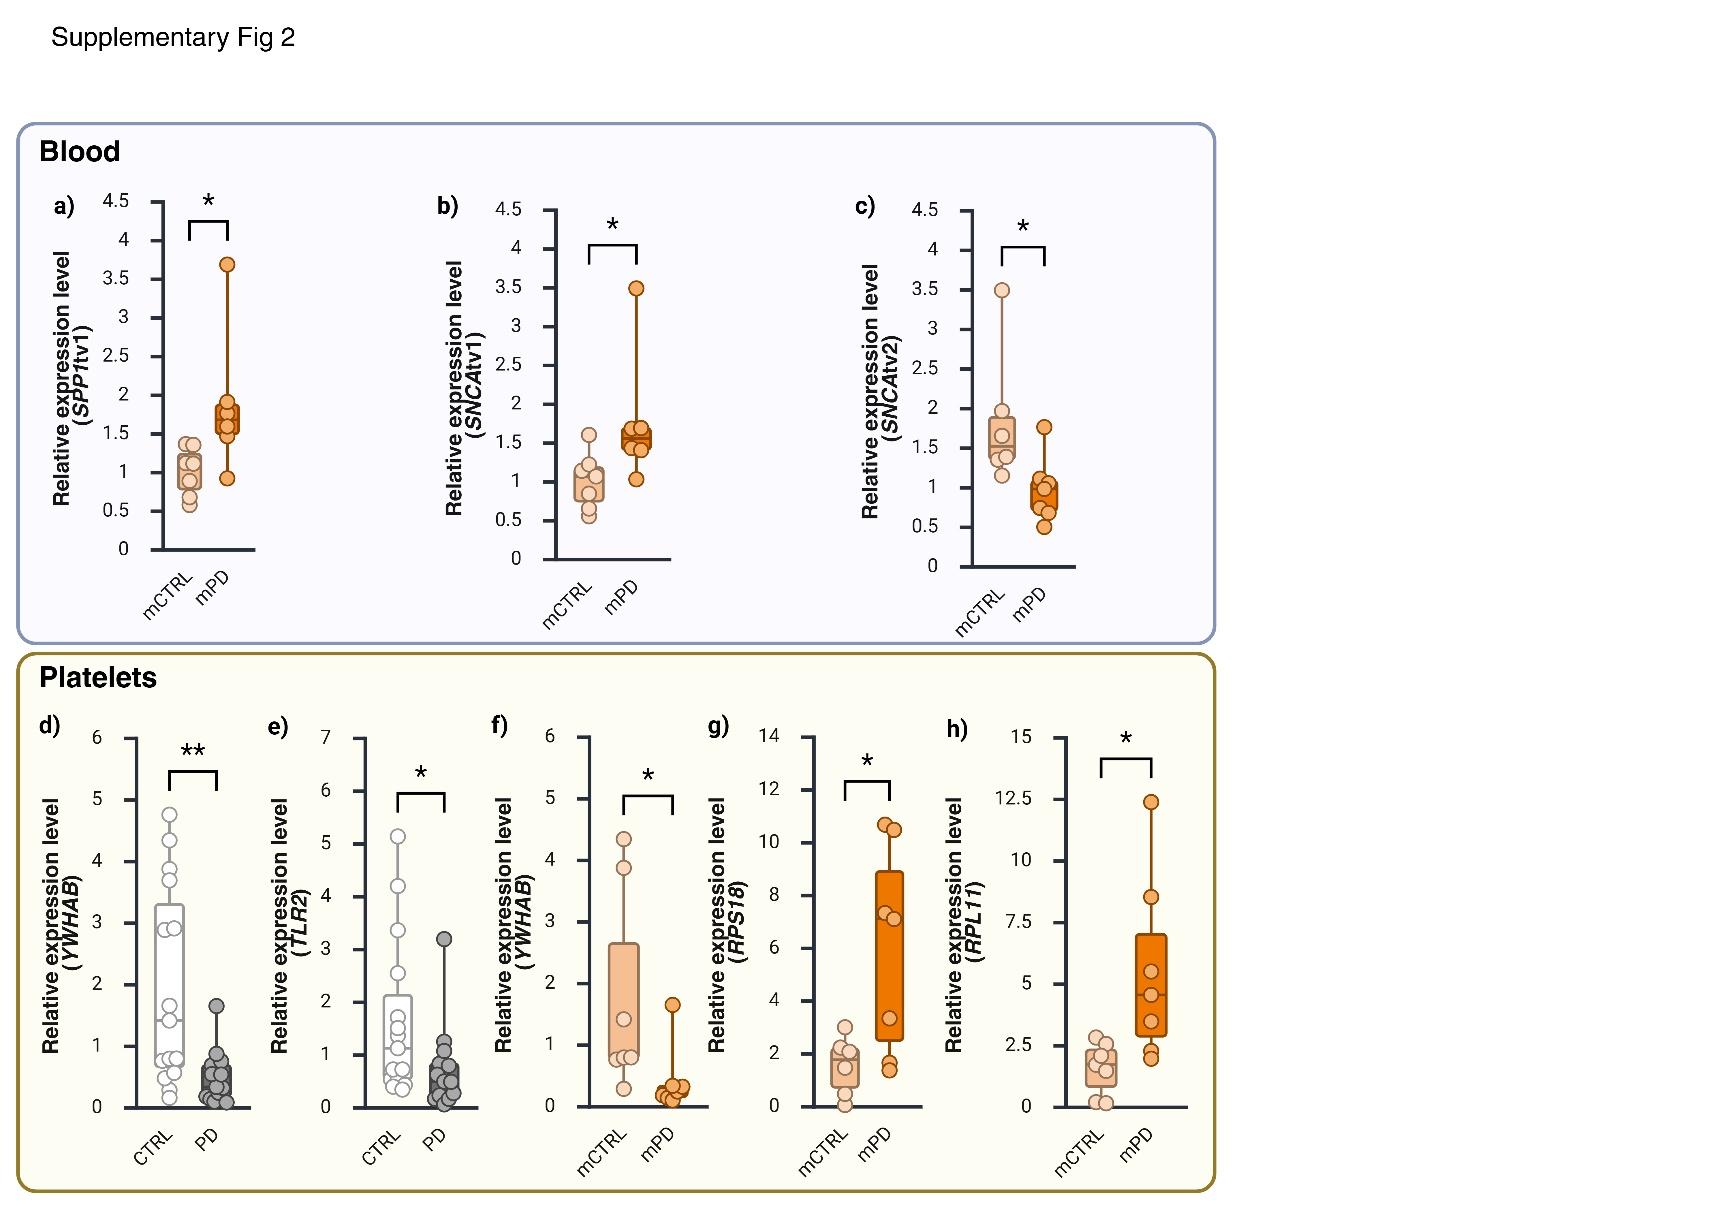
**Supplementary Fig.2.** **Differentially expressed genes in blood and PLTs from PD vs CTRLs.** Parkinson’s disease (PD), controls (CTRL), male PD (mPD), male controls (mCTRL) (*p<0.05, **p<0.01).


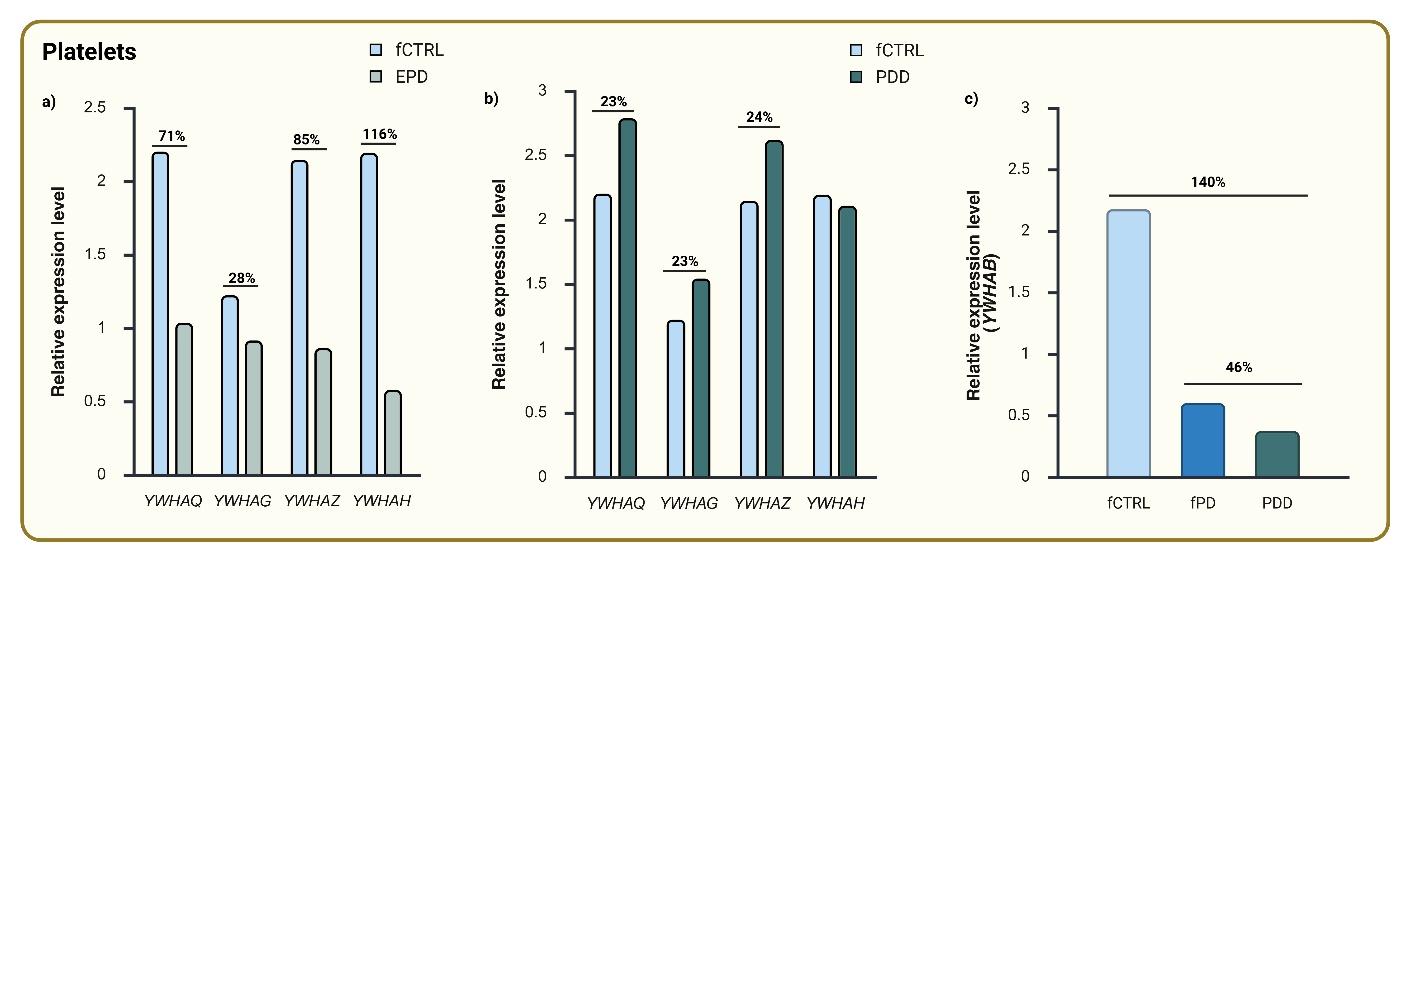
**Supplementary Fig 3**. **Expression of 14-3-3 genes in PLTs of patient SNCA3x.** Early-stage PD (EPD), advanced PD with dementia (PDD), female controls (fCTRL), female PD (fPD).


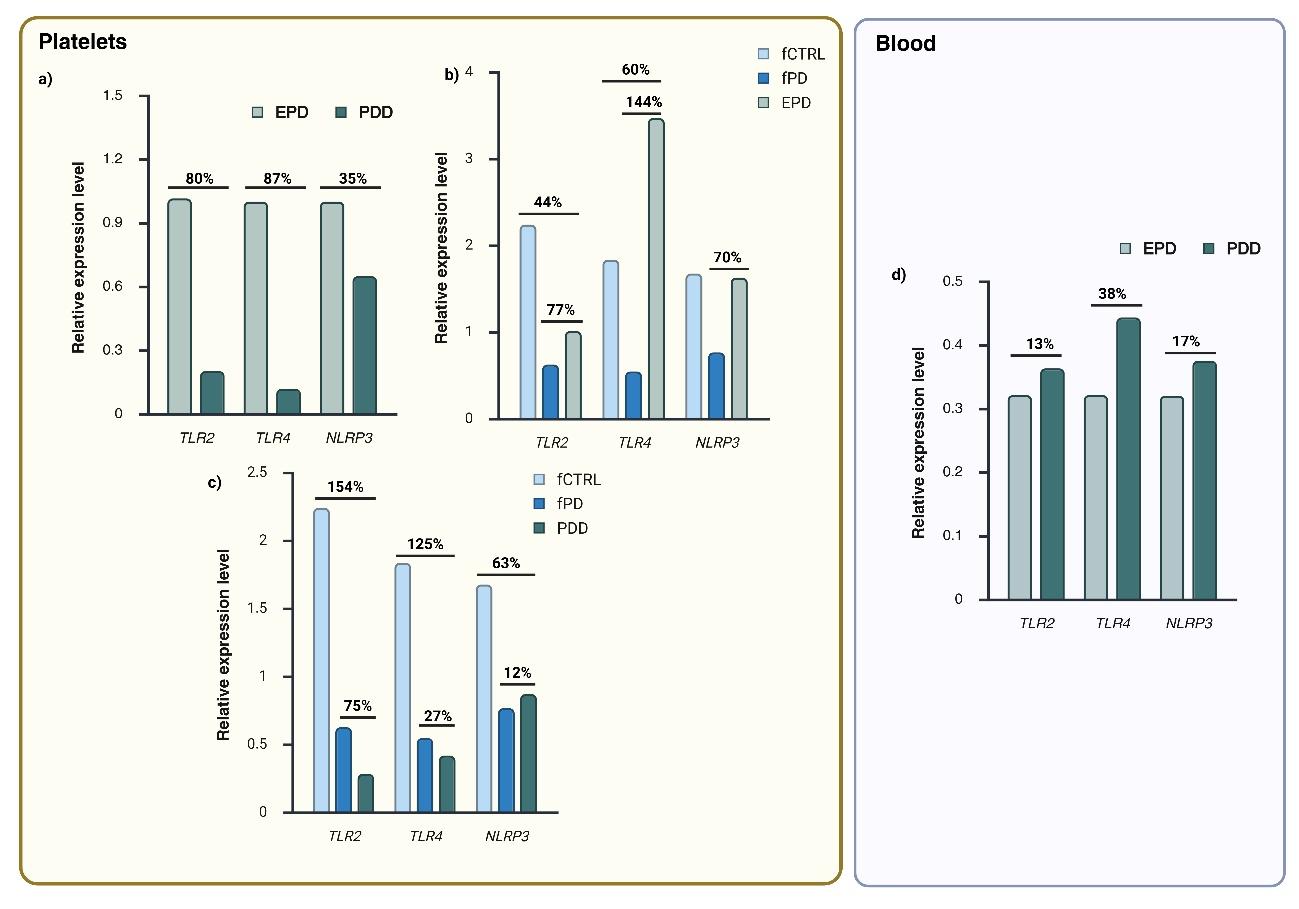


**Supplementary Fig 4. Expression of inflammatory genes in PLTs and blood of patient SNCA3x.** Early-stage PD (EPD), advanced PD with dementia (PDD), female controls (fCTRL), female PD (fPD).
